# Supplementary material
Source: PubMed Central journal article supplement (PMC5597783)
Supplement: hdy201737x1.pdf [file hdy201737x1.pdf]

**Supplementary Material to:**

**Assessing the expected response to genomic selection of individuals and families in  
*Eucalyptus* breeding with a model including dominance**

Rafael Tassinari Resende<sup>1</sup>, Marcos Deon Vilela Resende<sup>2,3</sup>, Fabyano Fonseca Silva<sup>5</sup>,  
Camila Ferreira Azevedo<sup>2</sup>, Elizabete Keiko Takahashi<sup>6</sup>, Orzenil Bonfim Silva-Junior<sup>4,7</sup> and  
Dario Grattapaglia<sup>4,7\*</sup>

**Table S1.** Incomplete diallel mating design amongst the ten parents (P1-P10) either as males ( $\sigma$ ) or females ( $\varphi$ ) and the corresponding families with the numbers of phenotyped /genotyped individuals.

| $\sigma \backslash \varphi$ | P1    | P2    | P3    | P4    | P5    | P6    | P7    | P8    | P9    |
|-----------------------------|-------|-------|-------|-------|-------|-------|-------|-------|-------|
| P1                          |       | 18/18 |       | 23/23 |       | 20/14 | 29/28 | 21/14 |       |
| P2                          | 7/7   |       |       | 8/8   | 12/11 | 6/6   |       | 5/3   | 8/8   |
| P3                          |       | 23/20 |       | 22/15 | 17/13 | 19/14 | 25/24 | 13/10 | 21/20 |
| P4                          |       | 16/15 |       |       |       | 5/5   | 27/26 | 24/17 | 26/26 |
| P5                          | 26/25 | 19/12 |       |       |       | 17/16 | 15/14 | 18/16 | 27/25 |
| P6                          |       | 15/15 |       | 21/21 | 7/7   |       | 4/3   | 6/6   | 5/5   |
| P7                          |       | 25/25 |       |       | 9/9   | 20/16 |       | 16/15 | 8/7   |
| P8                          |       | 18/18 |       |       |       | 18/18 | 6/6   |       | 25/16 |
| P9                          | 29/28 | 15/15 |       |       |       | 20/19 | 17/17 |       |       |
| P10                         |       | 23/22 | 17/16 |       | 15/11 |       |       |       |       |

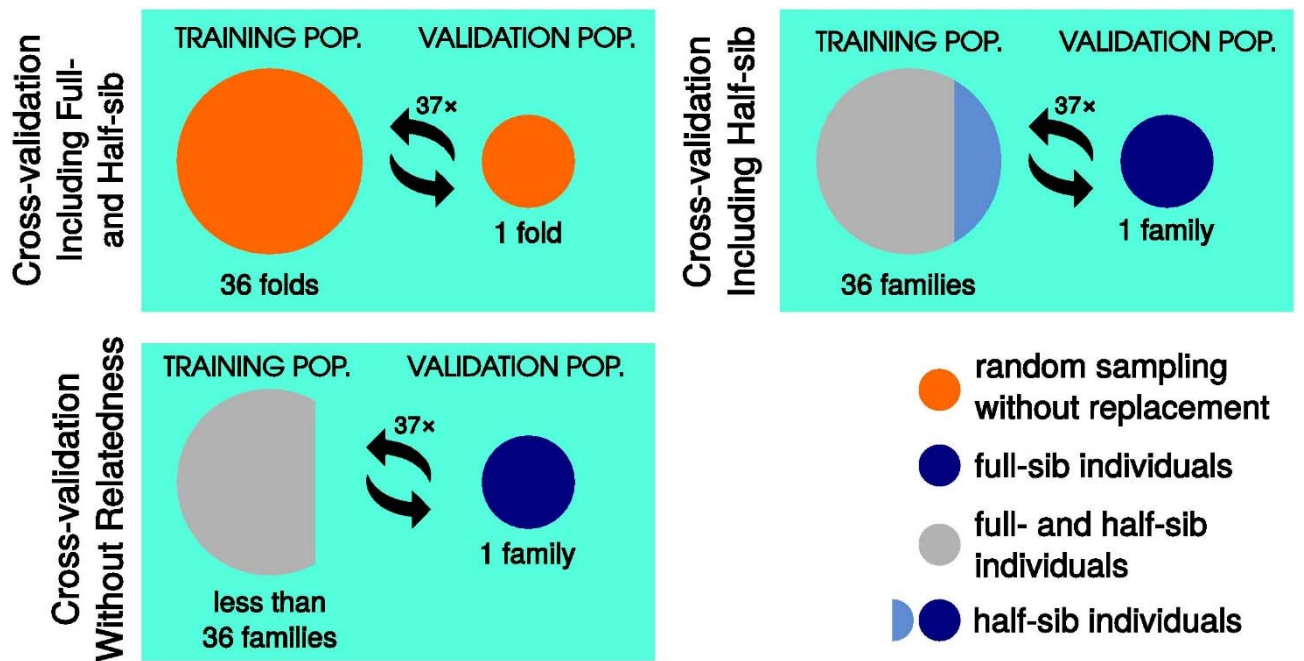

**Figure S1.** The three cross validation schemes controlling for relatedness between training and validation sets used to estimate the predictive abilities.

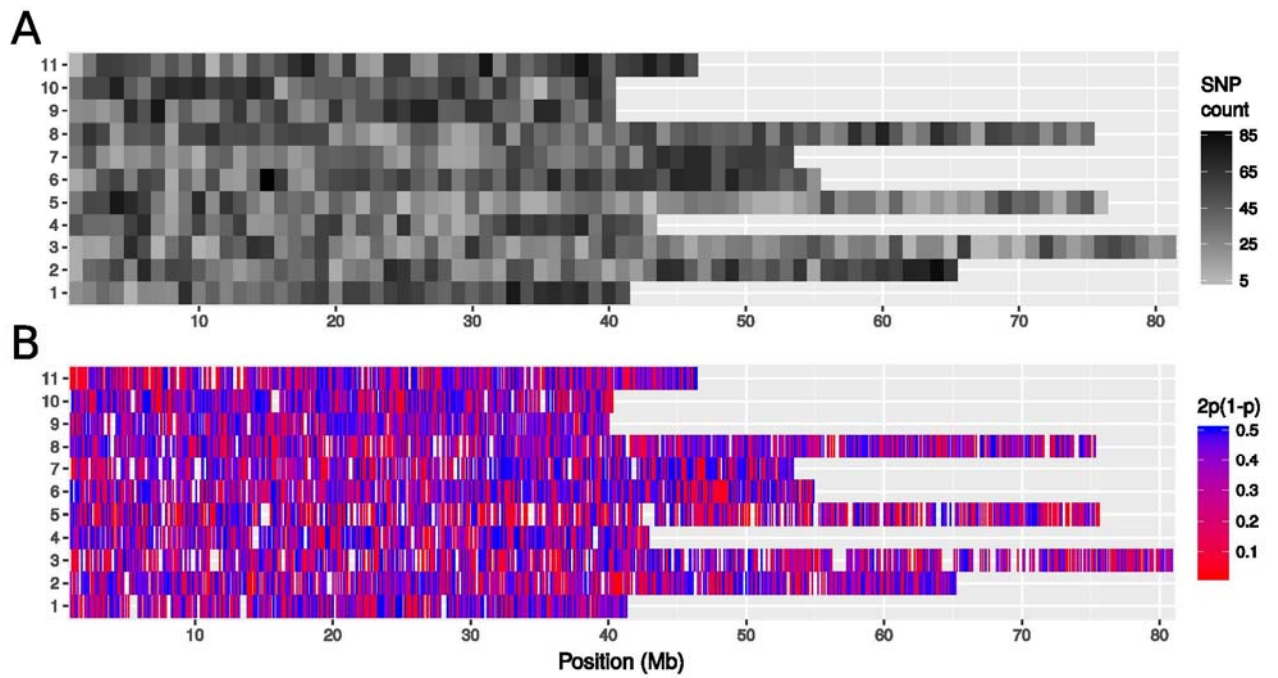

**Figure S2.** Distribution of the 24,806 polymorphic SNPs across the eleven *Eucalyptus* chromosomes. (A) SNP density per 1 Mb interval; (B) Expected heterozygosity of the genotyped SNPs for 100kb interval
